# Supplementary material for: Electrochemical monitoring of ROS influence on seedlings and germination response to salinity stress of three species of the tribe Inuleae
Source: Royal Society of Chemistry journal article supplement (doi:10.1039/c9ra02556a), 2019-01-01
Supplement: c9ra02556a1.pdf [file c9ra02556a1.pdf]

## Supplementary information

**Table S.1.** Percentage of seed germination of the tested species at different saline concentrations.

| G%                    | 0         | 50        | 100       | 150        | 200        | 300        | 400      |
|-----------------------|-----------|-----------|-----------|------------|------------|------------|----------|
| <i>D. viscosa</i>     | 85.0±8.1  | 92.0±10.1 | 75.9±12.6 | 69.0±8.3   | 59.3±11.0* | 16.6±14.3* | 1.0±2.0* |
| <i>L. crithmoides</i> | 94.4±6.7  | 83.0±5.5  | 83.8±7.3  | 89.3±3.5   | 65.7±9.8*  | 15.0±12.4* | 1.0±2.0* |
| <i>I. helenium</i>    | 100.0±0.0 | 100.0±0.0 | 88.4±3.2  | 44.4±16.0* | 34.9±21.5* | 1.2±2.4*   | 0.0±0.0* |

**Table S.2.** Variation of seed germination velocity of the tested species at different saline concentrations.

| MGT                   | 0        | 50       | 100       | 150       | 200        | 300       | 400       |
|-----------------------|----------|----------|-----------|-----------|------------|-----------|-----------|
| <i>D. viscosa</i>     | 5.2±0.8  | 6.4±0.4  | 8.1±0.7   | 9.0±0.9   | 14.2±1.7*  | 16.8±1.1* | 23.1±5.4* |
| <i>L. crithmoides</i> | 4.7±0.2  | 5.9±0.4  | 6.8±0.8   | 7.2±0.5   | 9.45±0.60* | 22.9±4.7* | 27.00*    |
| <i>I. helenium</i>    | 11.2±1.0 | 11.3±0.9 | 17.3±1.0* | 17.1±0.2* | 20.4±1.8*  | 17.0±0.0* | -         |

**Table S.3.** Variation of the reduction in seed germination percentage (RPG) of the tested species at different saline concentrations.

| RGP%                  | 0 | 50       | 100       | 150        | 200        | 300        | 400        |
|-----------------------|---|----------|-----------|------------|------------|------------|------------|
| <i>D. viscosa</i>     | - | 0.0±0.0  | 11.1±9.1* | 19.0±3.9*  | 30.7±6.7*  | 80.2±6.0*  | 94.4±2.6*  |
| <i>L. crithmoides</i> | - | 11.9±2.5 | 11.3±2.2  | 5.2±3.4    | 30.6±5.9*  | 82.2±15.0* | 98.8±2.4*  |
| <i>I. helenium</i>    | - | 0.0±0.0  | 11.6±3.2  | 55.6±16.0* | 65.1±21.5* | 98.8±2.4*  | 100.0±0.0* |

**Table S.4.** Variation of the time for first germination of seeds at the tested salt concentration in the different studied species.

| Day 1st G             | 0 | 50 | 100 | 150 | 200 | 300 | 400 |
|-----------------------|---|----|-----|-----|-----|-----|-----|
| <i>D. viscosa</i>     | 2 | 3  | 2   | 2   | 6   | 9   | 18  |
| <i>L. crithmoides</i> | 2 | 3  | 2   | 4   | 5   | 10  | 27  |
| <i>I. helenium</i>    | 7 | 6  | 11  | 13  | 15  | 17  | -   |

**Table S.5.** Variation in the percentage of seed recovery of the tested species exposed at different saline concentrations.

| R%                    | 100       | 150       | 200       | 300      | 400       |
|-----------------------|-----------|-----------|-----------|----------|-----------|
| <i>D. viscosa</i>     | 20.8±25.0 | 41.7±41.9 | 74.1±20.5 | 94.1±4.8 | 91.1±10.1 |
| <i>L. crithmoides</i> | 37.5±28.5 | 75.0±50.0 | 86.0±16.1 | 98.8±2.4 | 100.0±0.0 |
| <i>I. helenium</i>    | 100.0±0.0 | 100.0±0.0 | 100.0±0.0 | 83.7±8.5 | 63.7±18.9 |

**Figure S.1.** Square wave voltammogram at GCE of a 0.1 mM solution of 3,5- dicaffeoylquinic acid in air-saturated 0.25 M HAc/NaAc buffer at pH 4.75. Potential scan initiated at  $-0.2$  V vs. Ag/AgCl in the positive direction; potential step increment 4 m; square wave amplitude 25 mV; frequency 5 Hz.

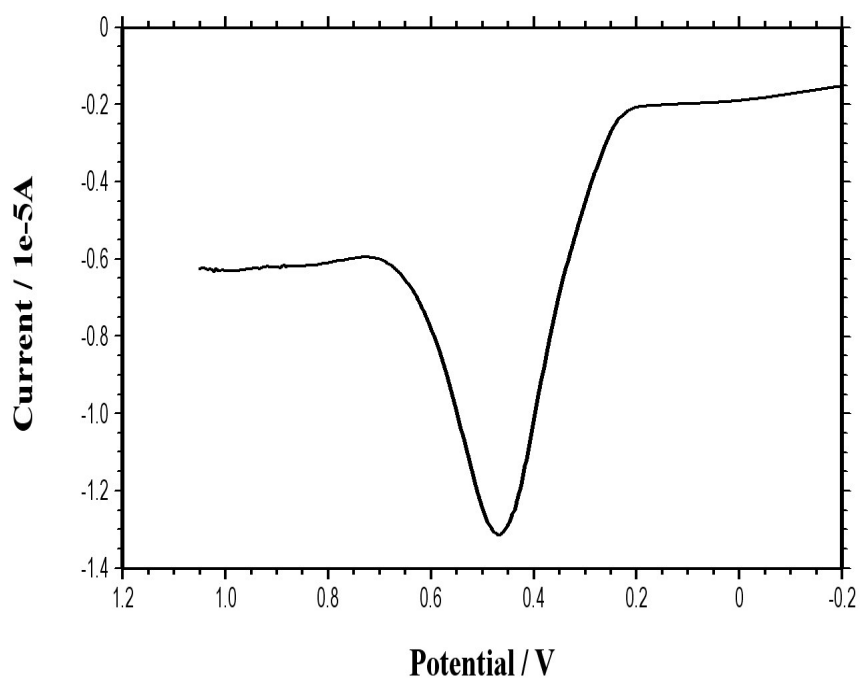

**Figure S.2.** Cyclic voltammogram of a microparticulate film of the ethanolic extract of leaves of seedlings of *Dittrichia viscosa* deposited on GCE in contact with 1.0 mM H<sub>2</sub>O<sub>2</sub> solution in 0.25 M HAc/NaAc buffer at pH 4.75. Potential scan initiated at –0.25 V vs. Ag/AgCl in the positive direction; potential scan rate 50 mV s<sup>–1</sup>. Semi-derivative data convolution was carried out to enhance peak resolution.

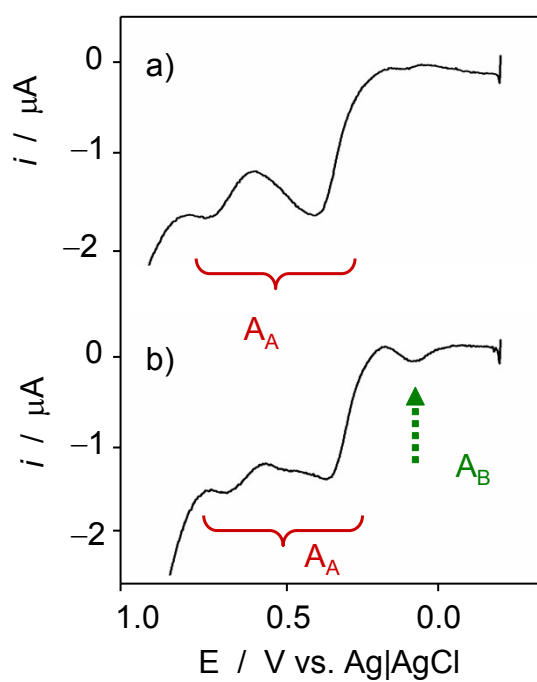

**Scheme S.1.** Mechanism proposed for the reduction of O<sub>2</sub> on carbon electrodes.<sup>52,53</sup> The first step consists of the one-electron reduction yielding adsorbed superoxide radical anion:

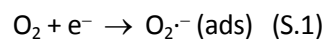

This radical can give hydroperoxide radical:

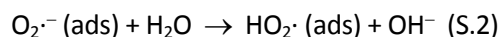

Competing with the disproportionation:

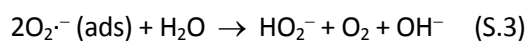

and electrochemical reduction:

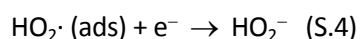

Processes, but can be directly reduced to hydroxyl radical and H<sub>2</sub>O<sub>2</sub>:

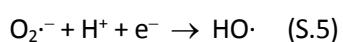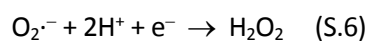

As a result, at short experimentation times, depending on the experimental conditions, a different proportion of intermediate ROS species can accompany the reduction of O<sub>2</sub> to H<sub>2</sub>O<sub>2</sub>.
